# Supplementary material for: A Europium-Based Optical Sensor for the Detection of Carbon Dioxide and Its Application for a Fermentation Reaction
Source: MDPI journal article supplement (doi:10.3390/chemosensors11010005), 2022-12-21
Supplement: s1 [file s1]

# Supporting Information

## **D Europium-Based Optical Sensor for the Detection of Carbon Dioxide and Its Application for a Fermentation Reaction**

**Erin N. Benton <sup>†</sup>, Nawagamu A. K. Rajitha Perera <sup>†</sup>, Vladimir N. Nesterov, Wijayantha Perera, Mohammad A. Omary <sup>\*</sup> and Sreekar B. Marpu <sup>\*</sup>**

Department of Chemistry, University of North Texas, Denton, TX 76203, USA

<sup>\*</sup> Correspondence: mohammad.omary@unt.edu (M.A.O.); sreekarbabu.marpu@unt.edu (S.B.M.)

<sup>†</sup> These authors contributed equally to this work.

Single crystal X-ray data for investigated compound was collected using a Rigaku XtaLAB Synergy-S diffractometer equipped with a HyPix-6000HE Hybrid Photon Counting (HPC) detector and dual Mo and Cu microfocus sealed X-ray source as well as a low-temperature Oxford Cryostream 800 liquid nitrogen cooling system at 100(2) K. Data collection strategy was calculated within CrysAlisPro (1.171.40.12b; Rigaku Oxford Diffraction, 2018) to ensure desired data redundancy and percent completeness. Unit cell determination, initial indexing, data collection, frame integration, Lorentz-polarization corrections and final cell parameter calculations were carried out using CrysAlisPro. An absorption correction was performed using the SCALE3 ABSPACK scaling algorithm embedded within CrysAlisPro. The structure was solved using ShelXT<sup>1</sup>, all non-hydrogen atoms were refined anisotropically using ShelXL<sup>2</sup> and space group was unambiguously verified by PLATON<sup>3</sup>. All hydrogen atoms were attached via the riding model at calculated positions. The large (2.56 eÅ<sup>-3</sup>) residual electron density located close to the europium atom (0.94 Å) is attributed to imperfect absorption corrections frequently encountered in heavy-metal atom structures. Olex2<sup>4</sup> was used for the preparation of the publication materials.

**Table S1:** Crystal structure data for the K [Eu(hfa)<sub>4</sub>] complex.

|                                                 |                                                                  |
|-------------------------------------------------|------------------------------------------------------------------|
| <b>Empirical Formula</b>                        | C <sub>20</sub> H <sub>4</sub> EuF <sub>24</sub> KO <sub>8</sub> |
| <b>Formula Weight</b>                           | 1019.29                                                          |
| <b>Temperature (K)</b>                          | 100                                                              |
| <b>Crystal System</b>                           | Triclinic                                                        |
| <b>Space group</b>                              | <i>P</i> -1                                                      |
| <b>a (Å)</b>                                    | 11.8320(3)                                                       |
| <b>b (Å)</b>                                    | 12.1224(2)                                                       |
| <b>c (Å)</b>                                    | 13.3146(3)                                                       |
| <b>α (°)</b>                                    | 73.434(2)                                                        |
| <b>β (°)</b>                                    | 65.661(2)                                                        |
| <b>γ (°)</b>                                    | 64.528(2)                                                        |
| <b>Volume (Å<sup>3</sup>)</b>                   | 1557.31(7)                                                       |
| <b>Z</b>                                        | 2                                                                |
| <b>Density calculated (g/mL)</b>                | 2.174                                                            |
| <b>Absorption coefficient (mm<sup>-1</sup>)</b> | 2.335                                                            |
| <b>2θ<sub>max</sub> (°)</b>                     | 25.679                                                           |
| <b>Reflections Collected</b>                    | 21379                                                            |
| <b>Independent Reflections</b>                  | 5917 [R(int) = 0.0382]                                           |
| <b>Absorption Correction</b>                    | Semi-empirical from equivalents                                  |
| <b>Goodness-of-Fit on F<sup>2</sup></b>         | 1.066                                                            |
| <b>Final R Indices [I&gt;2σ(I)]</b>             | R1 = 0.0363, wR2 = 0.0914                                        |
| <b>R Indices (all data)</b>                     | R1 = 0.0400, wR2 = 0.0931                                        |
| <b>Largest Diff. Peak and Hole</b>              | 2.535 and -1.002 e.Å <sup>-3</sup>                               |

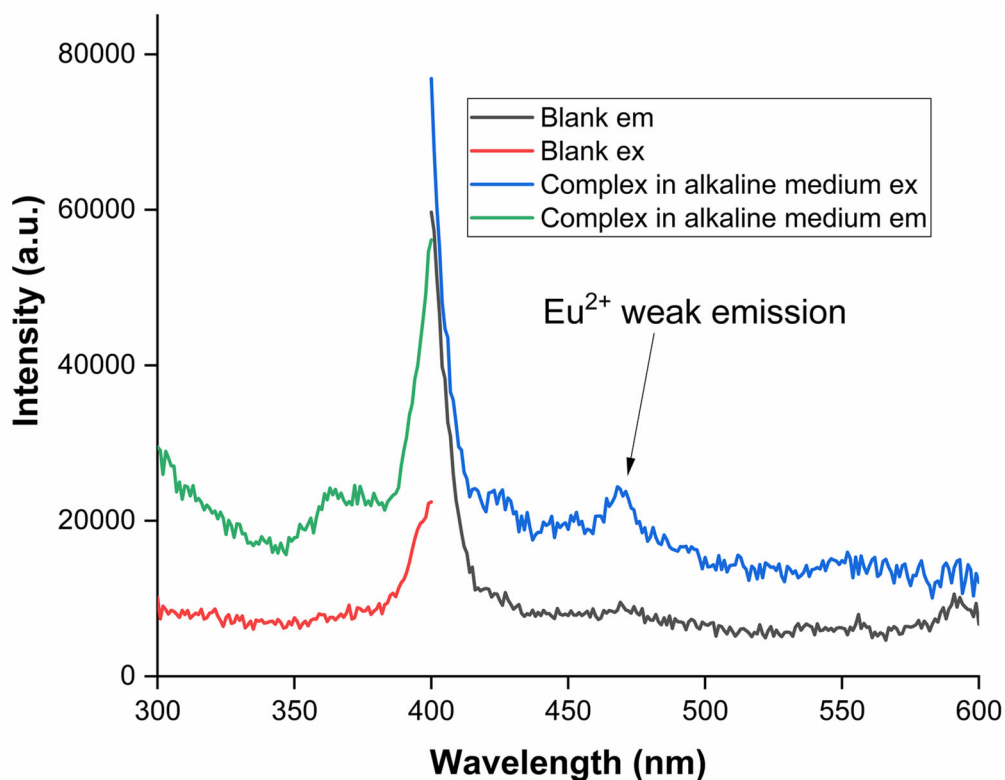

**Figure S1:** PL spectra of K[Eu(hfa)<sub>4</sub>] in alkaline medium (pH 8). Blank sample consist of methanol and PSS base. Sensor sample consists of methanol, PSS base and K[Eu(hfa)<sub>4</sub>]. Graph shows the weak  $\text{Eu}^{2+}$  peak at 468nm.

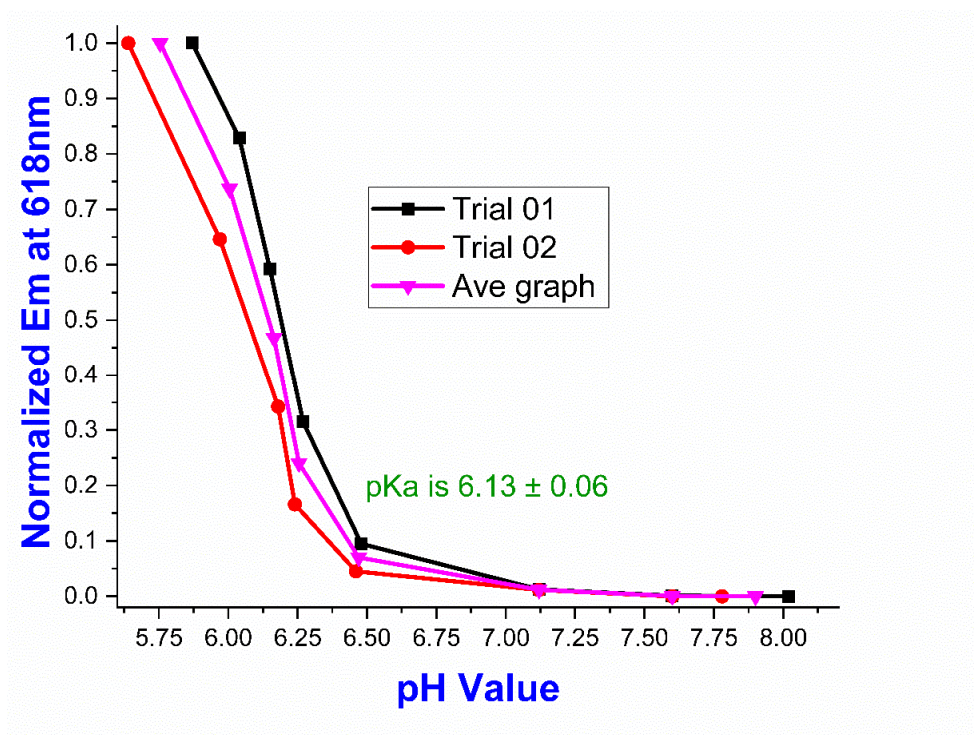

**Figure S2:** pKa determination of the complex K[Eu(hfa)<sub>4</sub>] in under constant  $\mu = 0.01$  M of  $\text{NH}_4\text{OH}$  in Ethylene glycol/ $\text{H}_2\text{O}$ . pKa was determined by taking 0.5 Normalized data point.

**Table S2:** pKa calculations. pKa was determined by taking 0.5 Normalized data point.

|                |            |
|----------------|------------|
| trial 01 (pKa) | 6.07008664 |
| trial 02 (pKa) | 6.1856817  |
| AVE pKa        | 6.12788417 |
| SD             | 0.05779753 |

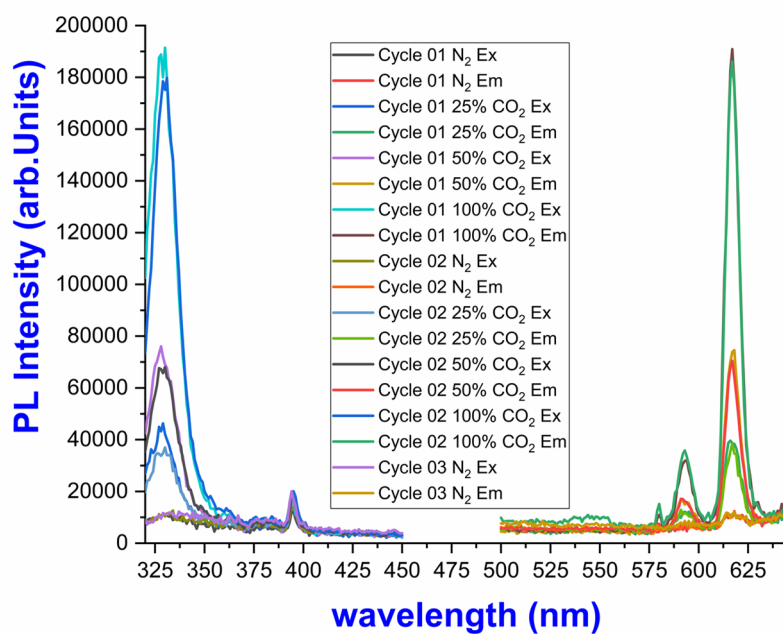

**Figure S3a:** Effect of Solvents towards CO<sub>2</sub> sensing in 100% MeOH

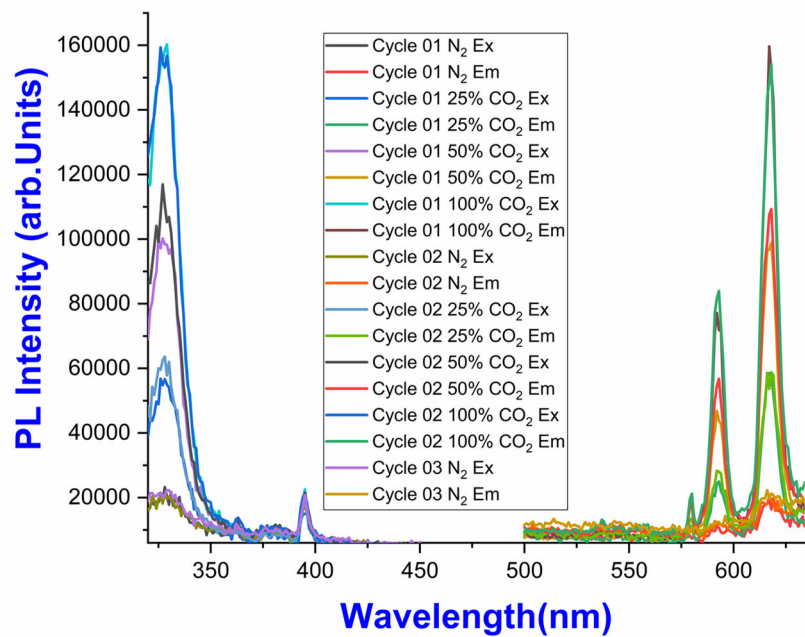

**Figure S3b:** Effect of Solvents towards CO<sub>2</sub> sensing 50:50 MeOH: H<sub>2</sub>O

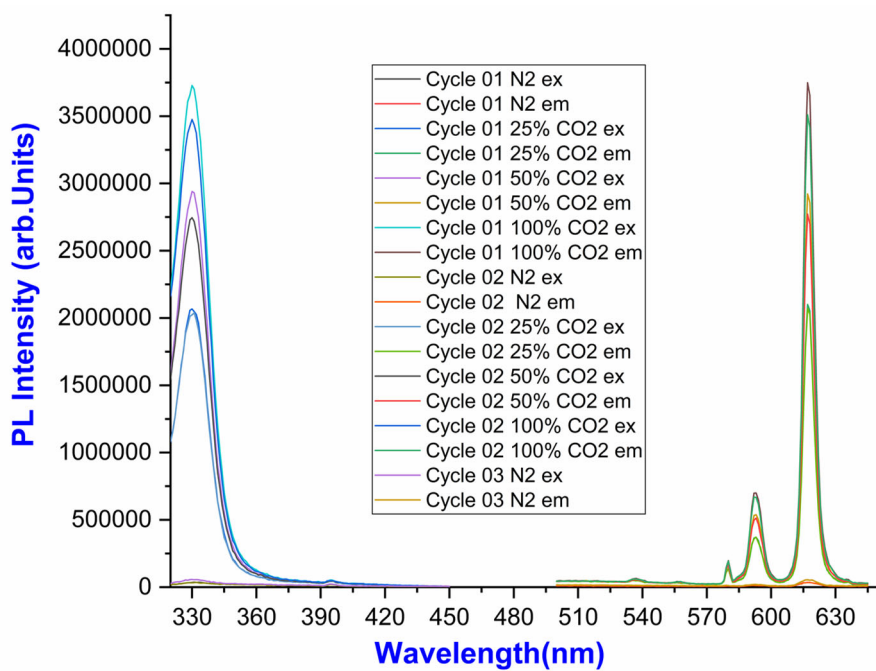

**Figure S3c:** Effect of Solvents towards CO<sub>2</sub> sensing 100% ethylene Glycol.

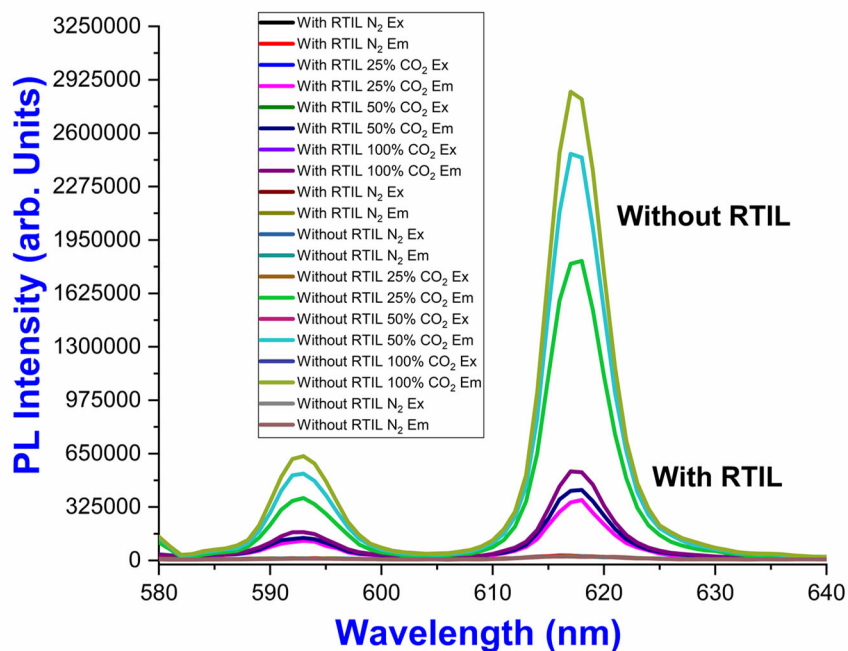

**Figure S4:** Effect of RTIL [1-butyl-3-methylimidazolium tetrafluoroborate (1B3MIMBF<sub>4</sub>)] in solution phase study for CO<sub>2</sub> sensitivity.

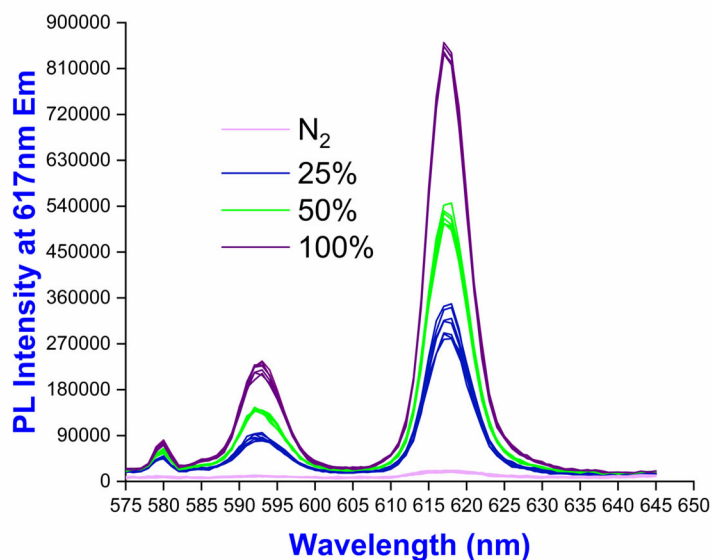

**Figure S5:** Fluorescence intensity of K[Eu(hfa)<sub>4</sub>] in ethylene glycol medium- Seven consecutive cycles. One Cycle sequence as follows: N<sub>2</sub>, 25% CO<sub>2</sub>, 50%CO<sub>2</sub> and 100%CO<sub>2</sub>.

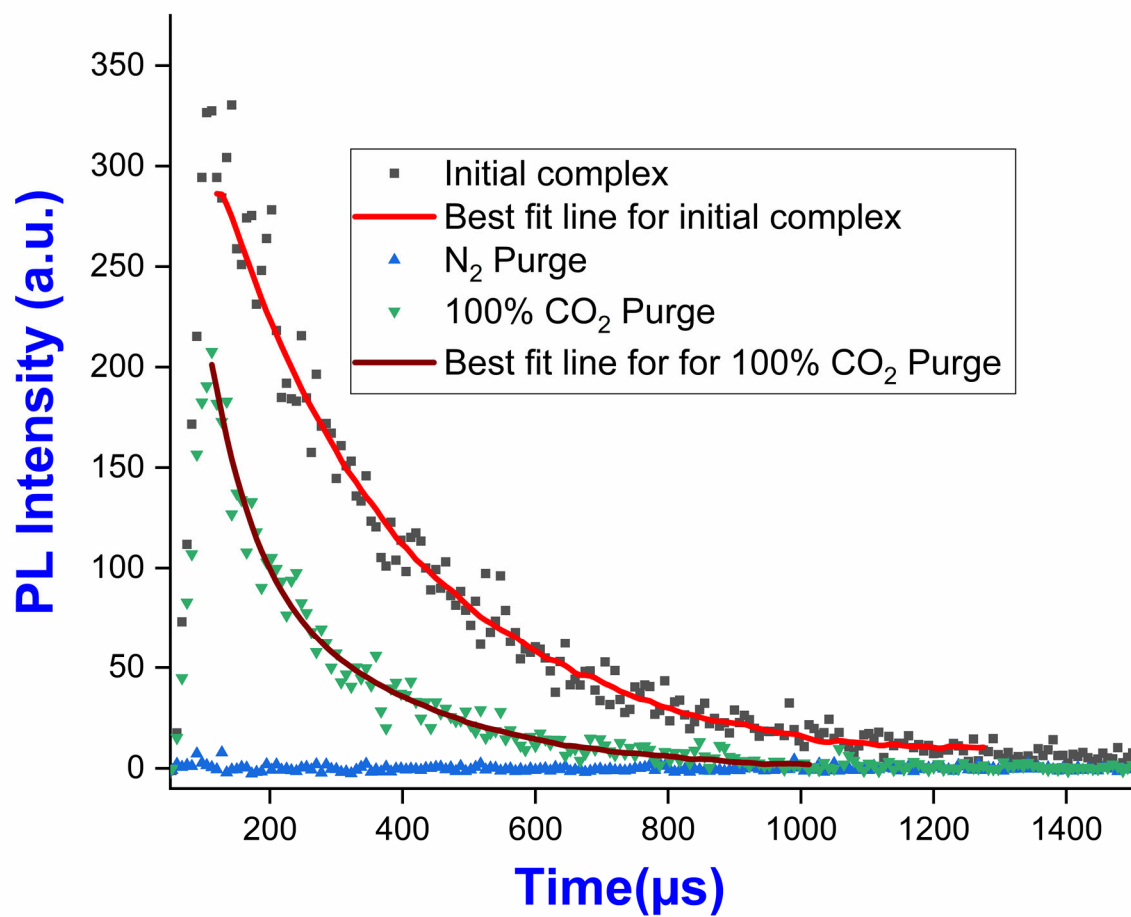

**Figure S6:** Emission lifetime data of K[Eu(hfa)<sub>4</sub>] for initial complex, after base/ N<sub>2</sub> purge and 100% CO<sub>2</sub> purge.

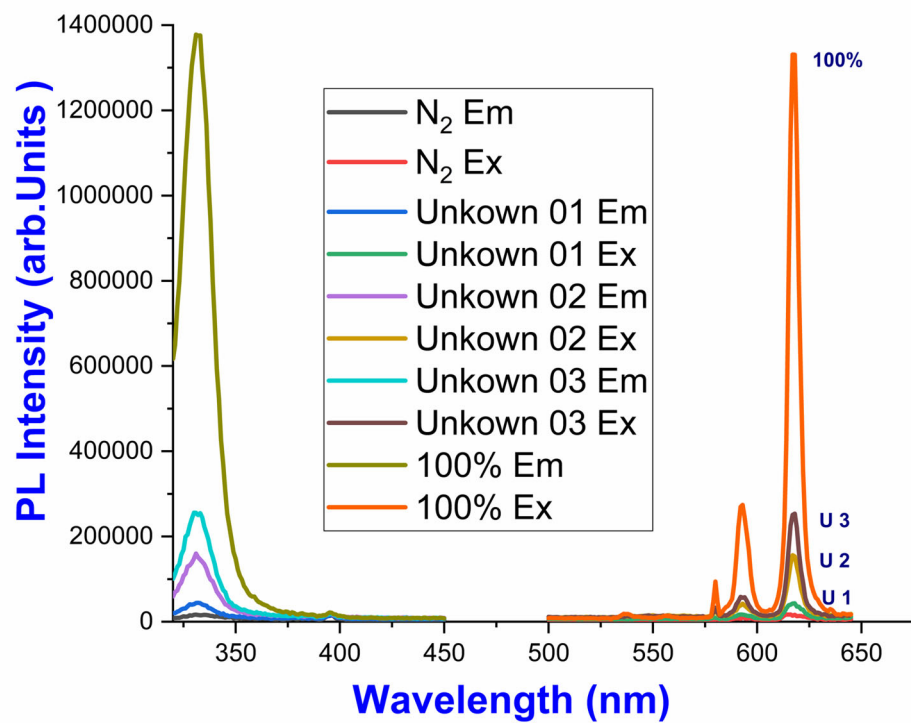

**Figure S7:** Fluorescence intensity of the sensor at unknown concentrations of gases.



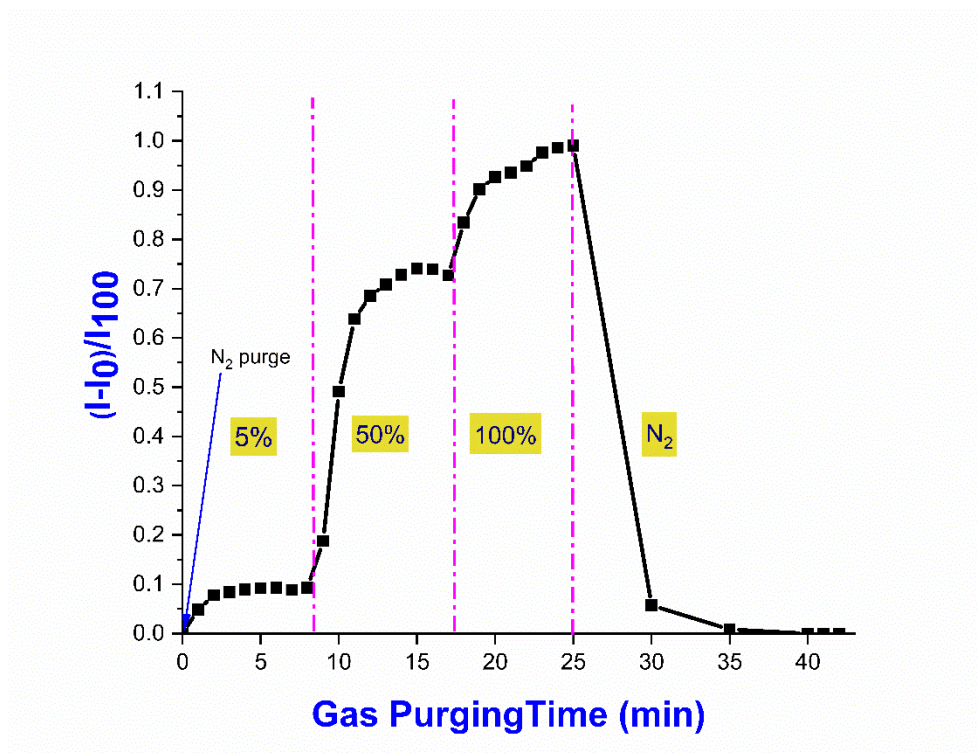

**Figure S8:** Response time of sensor switching between different concentrations of CO<sub>2</sub> gas.

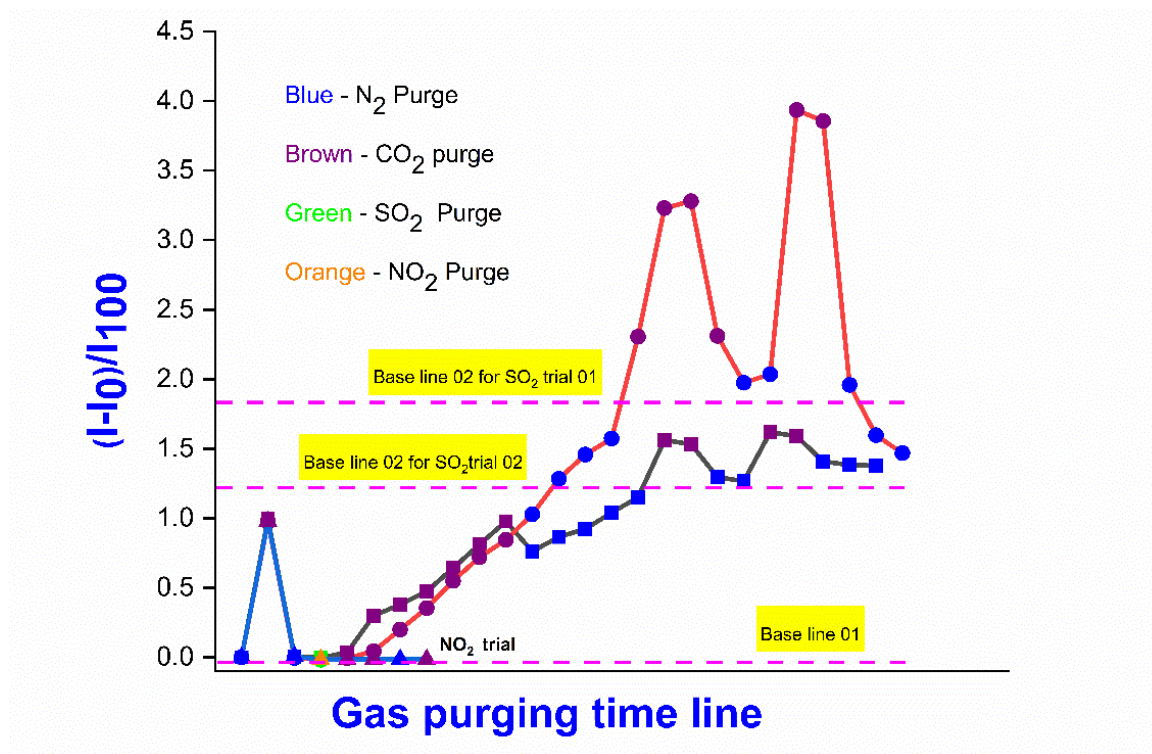

**Figure S9:** Fluorescence intensity of the sensor on purging with SO<sub>2</sub> and NO<sub>2</sub> gas to understand the interference.

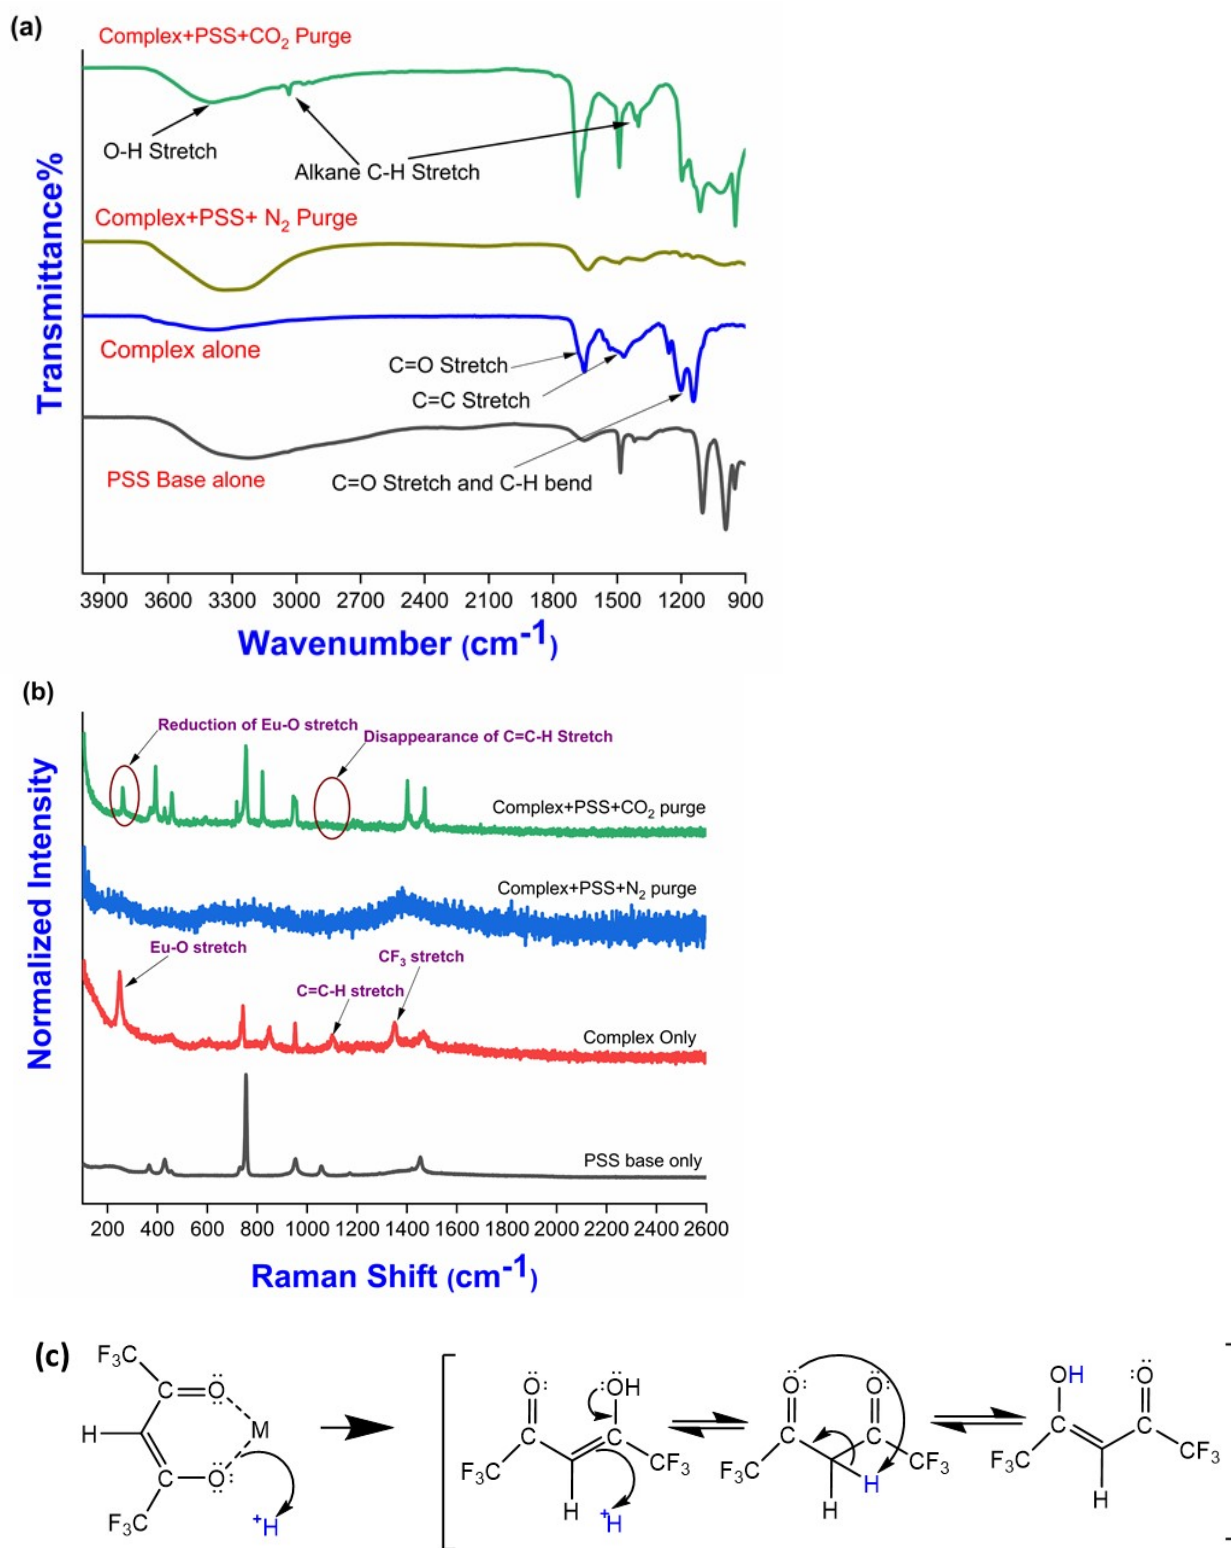

**Figure S10:** K[Eu(hfa)<sub>4</sub>] sensor was subjected 100% CO<sub>2</sub> purging and prepared solid sample for testing. (a) FTIR (b) Raman Spectroscopy was taken from the same solid samples (c) Schematic of enol formation of hfa ligands. FTIR and Raman spectroscopy of PSS (base) were included to identify the matrix influence on spectra.

**Table S3a:** Fluorescence intensities of three consecutive cycles of CO<sub>2</sub> purge (1%, 5%,10%, 25%, 50%,100%)

|      | [CO <sub>2</sub> %] | I <sub>0</sub> | I        | I/I <sub>0</sub> |
|------|---------------------|----------------|----------|------------------|
| Cy 1 | 0                   | 19491.2        | 19491.2  | 1                |
|      | 1                   | 19491.2        | 35410.9  | 1.816764         |
|      | 5                   | 19491.2        | 142505.1 | 7.311256         |
|      | 10                  | 19491.2        | 257637.5 | 13.21815         |
|      | 25                  | 19491.2        | 653727.4 | 33.53963         |
|      | 50                  | 19491.2        | 1031532  | 52.92297         |
|      | 100                 | 19491.2        | 1489809  | 76.43495         |
| Cy2  | 0                   | 17518.89       | 17518.89 | 1                |
|      | 1                   | 17518.89       | 45313.57 | 2.586554         |
|      | 5                   | 17518.89       | 150879.4 | 8.612384         |
|      | 10                  | 17518.89       | 257224.5 | 14.68269         |
|      | 25                  | 17518.89       | 646551.5 | 36.90595         |
|      | 50                  | 17518.89       | 1051304  | 60.00969         |
|      | 100                 | 17518.89       | 1496022  | 85.39477         |
| Cy 3 | 0                   | 19379.7        | 19379.7  | 1                |
|      | 1                   | 19379.7        | 42660.98 | 2.201323         |
|      | 5                   | 19379.7        | 146686.9 | 7.5691           |
|      | 10                  | 19379.7        | 280531.9 | 14.47555         |
|      | 25                  | 19379.7        | 676368.6 | 34.90088         |
|      | 50                  | 19379.7        | 1056604  | 54.52117         |
|      | 100                 | 19379.7        | 1531647  | 79.03355         |
| Cy 4 | 0                   | 23105.01       | 23105.01 | 1                |

**Table S3b:** CO<sub>2</sub>% calculations for three consecutive cycles.

| CO <sub>2</sub> % | Ave Intensity | Standard Deviation. |
|-------------------|---------------|---------------------|
| 0-1%              | 2.2           | 0.31                |
| 0-5%              | 7.83          | 0.56                |
| 0-10%             | 14.13         | 0.65                |
| 0-25%             | 35.12         | 1.38                |
| 0-50%             | 55.82         | 3.03                |
| 0-100%            | 80.39         | 3.65                |

**Table S4:** Emission lifetime data for initial complex, N<sub>2</sub> Purge and 100% CO<sub>2</sub> purge.

|                                  | Lifetime data                                                                                                                 |
|----------------------------------|-------------------------------------------------------------------------------------------------------------------------------|
| Initial complex                  | 303.3 ± 0.2209 (100%)<br>Chi2:0.9056<br>Durbin Watson: 1.663<br>Z=0.001563                                                    |
| After base/N <sub>2</sub> purge  | 0                                                                                                                             |
| After 100% CO <sub>2</sub> purge | Lifetime 1: 260.6 ± 0.3026 (46.64%)<br>Lifetime 2: 56.1 ± 0.3282 (53.36%)<br>Chi2:0.9432<br>Durbin Watson: 2.035<br>Z=0.04991 |

**Table S5:** LOD calculations using Residual standard deviation method.

| CO <sub>2</sub> % | Ave                                      | Residual=Y<br>res | Y-Yres   | (Y-Yres) <sup>2</sup> | Ave (I-I <sub>0</sub> )/I <sub>100</sub> = Y |
|-------------------|------------------------------------------|-------------------|----------|-----------------------|----------------------------------------------|
|                   | (I-I <sub>0</sub> )/I <sub>100</sub> = Y |                   |          |                       |                                              |
| 0                 | 0                                        | -0.002            | 0.002    | 0.000004              | 0                                            |
| 1                 | 0.014821651                              | 0.015             | -0.00018 | 3.18E-08              | 0.014821651                                  |
| 5                 | 0.084943849                              | 0.083             | 0.001944 | 3.78E-06              | 0.084943849                                  |
| 10                | 0.163527684                              | 0.168             | -0.00447 | 2.00E-05              | 0.163527684                                  |
| 25                | 0.425043126                              | 0.423             | 0.002043 | 4.17E-06              | 0.425043126                                  |

|                |          |
|----------------|----------|
| Residual<br>SD | 0.003265 |
| Slop           | 0.017    |
| LOD            | 0.57     |

**Table S6a:**  $I-I_0/I_{100}$  Vs  $[\text{CO}_2\%]$  calculations

|      | $[\text{CO}_2\%]$ | $I_0$    | $I$      | $I-I_0$  | $I-I_0/I$ | $(I-I_0)/I_{100}$ |
|------|-------------------|----------|----------|----------|-----------|-------------------|
| Cy 1 | 0                 | 19491.2  | 19491.2  | 0        | 0         | 0                 |
|      | 1                 | 19491.2  | 35410.9  | 15919.71 | 0.449571  | 0.010685737       |
|      | 5                 | 19491.2  | 142505.1 | 123013.9 | 0.863225  | 0.082570269       |
|      | 10                | 19491.2  | 257637.5 | 238146.4 | 0.924346  | 0.159850257       |
|      | 25                | 19491.2  | 653727.4 | 634236.2 | 0.970185  | 0.42571648        |
|      | 50                | 19491.2  | 1031532  | 1012041  | 0.981105  | 0.679309015       |
|      | 100               | 19491.2  | 1489809  | 1470317  | 0.986917  | 0.986916648       |
| Cy2  | 0                 | 17518.89 | 17518.89 | 0        | 0         | 0                 |
|      | 1                 | 17518.89 | 45313.57 | 27794.68 | 0.613385  | 0.018579055       |
|      | 5                 | 17518.89 | 150879.4 | 133360.5 | 0.883888  | 0.089143437       |
|      | 10                | 17518.89 | 257224.5 | 239705.6 | 0.931893  | 0.160228643       |
|      | 25                | 17518.89 | 646551.5 | 629032.6 | 0.972904  | 0.420470157       |
|      | 50                | 17518.89 | 1051304  | 1033785  | 0.983336  | 0.691022328       |
|      | 100               | 17518.89 | 1496022  | 1478503  | 0.98829   | 0.988289601       |
| Cy 3 | 0                 | 19379.7  | 19379.7  | 0        | 0         | 0                 |
|      | 1                 | 19379.7  | 42660.98 | 23281.28 | 0.545728  | 0.01520016        |
|      | 5                 | 19379.7  | 146686.9 | 127307.2 | 0.867884  | 0.08311784        |
|      | 10                | 19379.7  | 280531.9 | 261152.2 | 0.930918  | 0.170504153       |
|      | 25                | 19379.7  | 676368.6 | 656988.9 | 0.971347  | 0.428942741       |
|      | 50                | 19379.7  | 1056604  | 1037224  | 0.981659  | 0.677195397       |
|      | 100               | 19379.7  | 1531647  | 1512267  | 0.987347  | 0.987346907       |
| Cy 4 | 0                 | 23105.01 | 23105.01 | 0        | 0         | 0                 |

**Table S6b:**  $I-I_0/I_{100}$  Vs  $[\text{CO}_2\%]$  average and standard deviation calculations

| $\text{CO}_2 \%$ | Ave $(I-I_0)/I_{100}$ | SD       |
|------------------|-----------------------|----------|
| 0                | 0                     | 0        |
| 1                | 0.014821651           | 0.003234 |
| 5                | 0.084943849           | 0.002978 |
| 10               | 0.163527684           | 0.004936 |
| 25               | 0.425043126           | 0.003492 |
| 50               | 0.682508914           | 0.006081 |
| 100              | 0.987517719           | 0.000573 |

**Table S7:** CO<sub>2</sub> Probe Validation with Carbon dioxide Cylinders.

| CO <sub>2</sub> % in Cylinder | Reading on the Probe | Pictures of the CO <sub>2</sub> reading                                               |
|-------------------------------|----------------------|---------------------------------------------------------------------------------------|
| 1%                            | 1%                   |     |
| 25%                           | 26.16%               |     |
| 50%                           | 52.31%               |  |
| 100%                          | 100%                 |  |

**Table S8:** Fermentation trial 1 data Pictures from the CO<sub>2</sub> Probe on sugar in respective time intervals.

| Time (Min) | Pictures                                                                            | Time (Min) | Pictures                                                                              |
|------------|-------------------------------------------------------------------------------------|------------|---------------------------------------------------------------------------------------|
| 0 min      |    | 10 min     |    |
| 20 min     |   | 30 min     |   |
| 40 min     |  | 50 min     |  |
| 60 min     |  |            |                                                                                       |



**Table S9:** Fermentation trial 2 data Pictures from the CO<sub>2</sub> Probe on sugar in respective time intervals.

| Time (Min) | Pictures                                                                            | Time (Min) | Pictures                                                                              |
|------------|-------------------------------------------------------------------------------------|------------|---------------------------------------------------------------------------------------|
| 0 min      |    | 10 min     |    |
| 20 min     |   | 30 min     |   |
| 40 min     |  | 50 min     |  |
| 60 min     |  |            |                                                                                       |



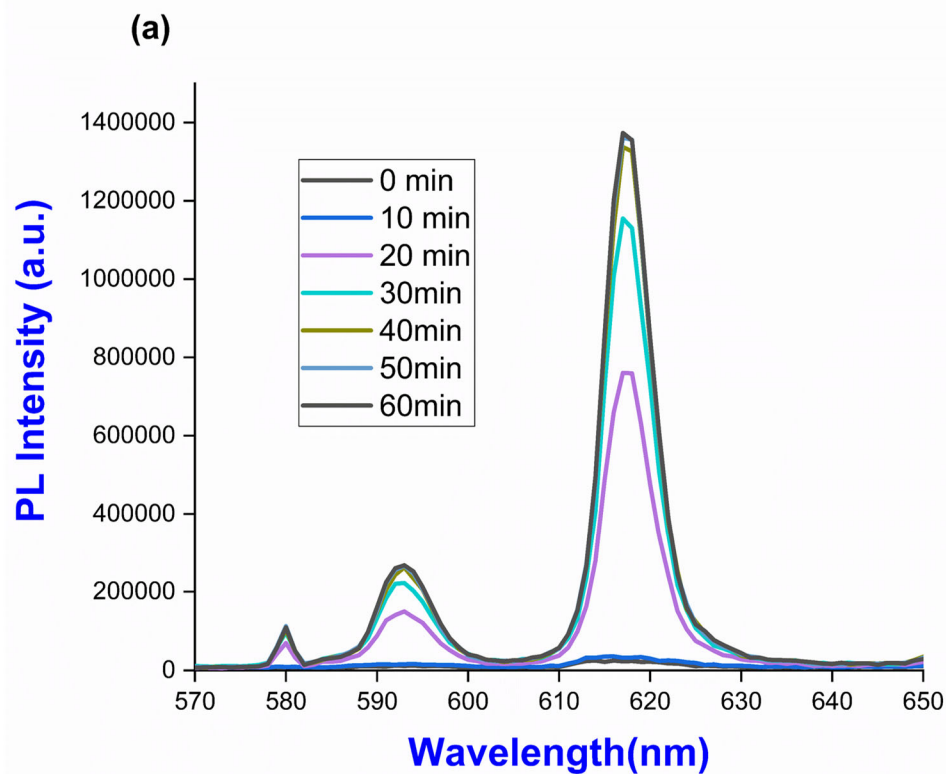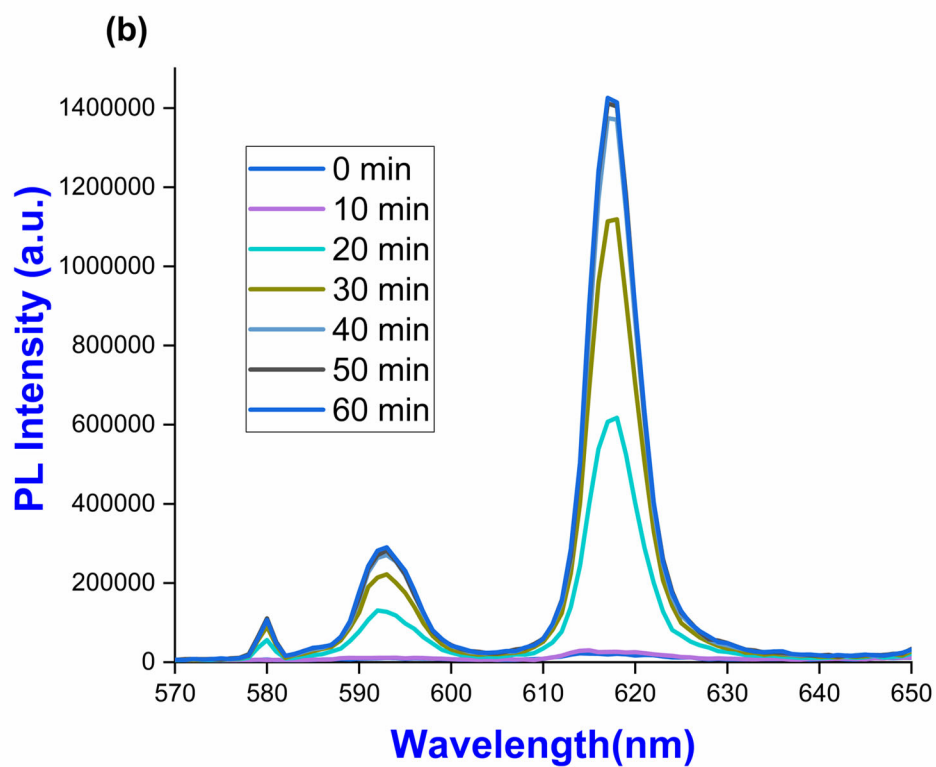

**Figure S11:** Fermentation experiments conducted with 0.93M sugar concentration and 2.5g of yeast for one hour. The readings were taken after every 10 min. (a) trial 01 (b) trial 02

## Reference

1. Sheldrick, G.M. SHELXT - Integrated space-group and crystal-structure determination. *Acta Crystallogr. A Found. Adv.* **2015**, *71*, 3–8.
2. Sheldrick, G.M. Crystal structure refinement with SHELXL. *Acta Crystallogr. C Struct. Chem.* **2014**, *71*, 3–8.
3. Spek, A.L. Structure validation in chemical crystallography. *Acta Crystallogr. Sect. D Biol. Crystallogr.* **2009**, *65*, 148–155, <https://doi.org/10.1107/s090744490804362x>.
4. Dolomanov, O.V.; Bourhis, L.J.; Gildea, R.J.; Howard, J.A.K.; Puschmann, H. OLEX2: a complete structure solution, refinement and analysis program. *J. Appl. Cryst.* **2009**, *42*, 339–341.
